# Supplementary material
Source: publisher site journal article supplement (https://www.spandidos-publications.com/3449/downloadSupplementary)
Supplement: Supplementary file 1 [file downloadSupplementary]

Figure S1. Transfection efficiency of pcDNA3.1-GRINAp plasmid in LoVo cells. GRIN A (A) mRNA and (B) protein expression levels were determined by reverse transcription-quantitative PCR and western blotting.  $^{**}P<0.01$  vs. NC plasmid. GRIN A, glutamate receptor, ionotropic, N-methyl D-aspartate-associated protein 1; NC, negative control; OE, overexpression.

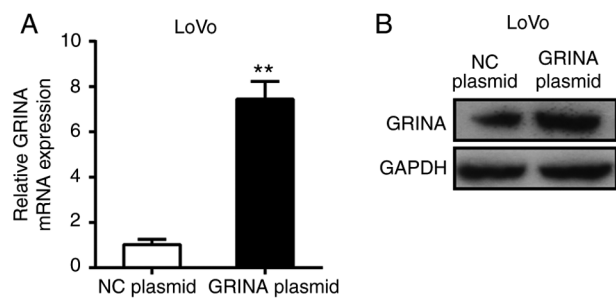

Table SI. Clinical characteristics of patients with colorectal cancer.

| Clinical characteristic | Case, n (%) |
|-------------------------|-------------|
| Age, years              |             |
| <60                     | 52 (32.3)   |
| ≥60                     | 109 (67.7)  |
| Sex                     |             |
| Male                    | 80 (49.7)   |
| Female                  | 81 (50.3)   |
| T stage                 |             |
| T1 and T2               | 52 (32.2)   |
| T3 and T4               | 109 (67.7)  |
| Lymphatic invasion      |             |
| Absent                  | 77 (47.8)   |
| Present                 | 84 (52.2)   |
| Differentiation         |             |
| Well                    | 35 (21.7)   |
| Moderate                | 70 (43.5)   |
| Poor                    | 56 (34.8)   |
| TNM stage               |             |
| I                       | 20 (12.4)   |
| II                      | 57 (35.4)   |
| III                     | 84 (52.2)   |
| Tumor location          |             |
| Colon                   | 73 (45.3)   |
| Rectum                  | 88 (54.7)   |

Table SII. Sequences of shRNAs used in the present study.

| shRNA                                                                                                                                                     | Sequence (5'→3')                                     |
|-----------------------------------------------------------------------------------------------------------------------------------------------------------|------------------------------------------------------|
| shGRINA                                                                                                                                                   | F: GGUUGUGCGUACAAAGCACTT<br>R: GUGCUUUGUACGCACAACCTT |
| shNC                                                                                                                                                      | F: UUCUCCGAACGUGUCACGUTT<br>R: ACGUGACACGUUCGGAGAATT |
| shRNA, short hairpin RNA; F, forward; R, reverse; NC, negative control; GRINA, glutamate receptor, ionotropic, N-methyl D-aspartate-associated protein 1. |                                                      |
